# Supplementary material
Source: HighWire-hosted journal article supplement (https://www.cmaj.ca/content/suppl/2018/02/01/190.5.E126)
Supplement: 1711151-infographic.pdf [file 1711151-infographic.pdf]

# Initial findings of the PERSONAL GENOME PROJECT CANADA

**56** healthy people had  
their genome sequenced

**95%**

had rare recessive  
mutations, which could  
be passed on to children

**25%**

had variants  
linked with  
diseases

**23%**

had variants  
indicating risk of  
severe drug allergy

## SHRINKING COST OF WHOLE GENOME SEQUENCING

2007 **\$1000000**  
2017 **\$1000**  
? **\$100**

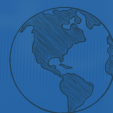

There is a worldwide effort to  
put genomic sequencing data  
into the public realm.

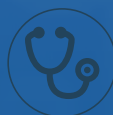

Genomic sequencing has the  
potential to predict disease and  
inform health decisions.

What is  
whole genome  
sequencing?

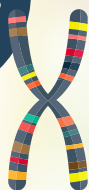

**Whole genome sequencing:**  
identify all 3 billion+  
nucleotide pairs that make  
up a person's genome

**Variants:** different versions of a known sequence of  
nucleotides, which can be benign, pathogenic (e.g. cystic  
fibrosis or breast cancer) or of unknown significance

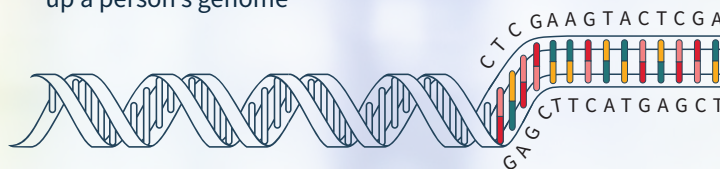

**cmaj**
